# Supplementary material
Source: publisher figshare collection journal article supplement (https://sage.figshare.com/ndownloader/files/14878046)
Supplement: Supplementary file 1 [file 14878046]

**Web Table 1.**

Seasonal variation in Google search volumes for seeking help for domestic violence and variation in police calls registered as domestic violence (observed ‘O’, expected ‘E’, confidence intervals ‘CI’), Finland, 2017
